# Supplementary material for: Entrepreneurial education and students' entrepreneurial intention: does team cooperation matter?
Source: Springer Nature journal article supplement (doi:10.1186/s40497-019-0157-3), 2019-04-23
Supplement: MOESM1 [file 16672346]

The items of questionnaire

| **Variables** | **Items** |
| --- | --- |
| **Entrepreneurial education** | 1. Entrepreneurial education helped me develop my sense of initiative—a sort of entrepreneurial attitude. |
| 1. Entrepreneurial education helped me to better understand the role of entrepreneurs in society. |
| 1. Entrepreneurial education made me interested to become an entrepreneur. |
| 1. Entrepreneurial education gave me skills and know-how that enable me to run a business. |
| **Entrepreneurial self-efficacy** | 1. I have confidence in my ability to solve problems creatively. |
| 1. I think I'm good at coming up with new ideas. |
| 1. I am very good at developing another set of ideas from other people's ideas. |
| 1. I'm very good at figuring out new ways to solve problems. |
| **Entrepreneurial passion** | 1. It is exciting to figure out new ways to solve unmet market needs that can be commercialized. |
| 1. Searching for new ideas for products/services to offer is enjoyable to me. |
| 1. I am motivated to figure out how to make existing products/services better. |
| 1. Scanning the environment for new opportunities really excites me. |
| 1. Inventing new solutions to problems is an important part of who I am. |
| 1. Establishing a new company excites me. |
| 1. Owning my own company energizes me. |
| 1. Nurturing a new business through its emerging success is enjoyable. |
| 1. Being the founder of a business is an important part of who I am. |
| 1. I really like finding the right people to market my product/service. |
| 1. Assembling the right people to work for my business is exciting. |
| 1. Pushing my employees and myself to make our company better motivates me. |
| 1. Nurturing and growing companies is an important part of who I am. |
| **Entrepreneurial intention** | 1. I intend to start a business during school or after graduation. |
| 1. I am eager to have my own business. |
| 1. I have a detailed business planning and ideas. |
| 1. I will actively learn about entrepreneurial knowledge and learn about the detailed process of entrepreneurship. |
| **Team cooperation** | 1. There is a high level of cooperation between team members. |
| 1. People are willing to sacrifice their self-interest for the benefit of the team. |
| 1. There is a high level of sharing between team members. |
